# Supplementary material for: Molecular Changes in Prader-Willi Syndrome Neurons Reveals Clues About Increased Autism Susceptibility
Source: PubMed Central journal article supplement (PMC8586424; doi:10.3389/fnmol.2021.747855), 2021-10-29
Supplement: Data_Sheet_1.pdf [file Data_Sheet_1.pdf]

## *Supplementary Material*

### 1 Supplementary Tables

| <b>Cell Line</b> | <b>Diagnosis</b> | <b>Sex</b> | <b>ASD Status</b> |
|------------------|------------------|------------|-------------------|
| 38*              | N/A              | F          | Unknown           |
| 182*             | N/A              | F          | Normal            |
| 189*             | N/A              | F          | Unknown           |
| 238*             | N/A              | M          | Normal            |
| 195              | N/A              | M          | Normal            |
| 312              | N/A              | M          | Normal            |
| 152*             | PW deletion      | M          | Normal            |
| 192*             | PW deletion      | F          | Normal            |
| 225*             | PW deletion      | M          | Normal            |
| 258*             | PW deletion      | F          | Normal            |
| 148              | PW deletion      | M          | Normal            |
| 307              | PW deletion      | F          | Normal            |
| 156*             | PW UPD           | F          | Normal            |
| 162*             | PW UPD           | F          | Normal            |
| 171*             | PW UPD           | F          | Normal            |
| 249*             | PW UPD           | F          | Normal            |
| 270              | PW UPD           | F          | Normal            |

|      |        |   |              |
|------|--------|---|--------------|
| 191  | PW UPD | M | Normal       |
| 235  | PW UPD | M | Normal       |
| 197  | PW UPD | M | Normal       |
| 94*  | PW UPD | F | Possible ASD |
| 228* | PW UPD | M | Possible ASD |
| 250* | PW UPD | M | Possible ASD |
| 268* | PW UPD | F | Possible ASD |
| 277  | PW UPD | F | Possible ASD |
| 181  | PW UPD | M | Possible ASD |

**Supplementary Table 1.** Cell lines used for RNAseq and immunocytochemistry analysis. Asterisk (\*) denotes subjects used in RNAseq experiment.

| <b>Gene</b>          | <b>Function</b>                                                                               | <b>Link to PWS</b>                                                                                                                              |
|----------------------|-----------------------------------------------------------------------------------------------|-------------------------------------------------------------------------------------------------------------------------------------------------|
| <b><i>PEX10</i></b>  | Peroxisomes breakdown toxins and synthesize lipids                                            | Mutations lead to Zellweger syndrome. Primary phenotypes of Zellweger syndrome are hypotonia and neurodevelopmental delay [80]                  |
| <b><i>SNTB2</i></b>  | Plays a role in regulation of secretory granules and localization of membrane proteins        | Dystrophins are associated with muscular dystrophy [81]                                                                                         |
| <b><i>CTDP1</i></b>  | Dephosphorylates a subunit of RNApol making it available for transcription                    | Mutations are associated with neuropathy, facial dysmorphism, and cataracts [82]                                                                |
| <b><i>AKT1S1</i></b> | Subunit of mTORC, which regulates cell growth in response to nutrients and hormonal signaling | Altered mTORC signaling has been linked to a variety of neurological disorders including autism, epilepsy, and neurodegenerative disorders [83] |

|               |                                                                       |                                                                                                                      |
|---------------|-----------------------------------------------------------------------|----------------------------------------------------------------------------------------------------------------------|
| <i>ATP7A</i>  | Supplies copper to copper requiring proteins in the secretory pathway | Associated with Menkes disease [84]. Primary phenotypes are hypotonia, hypothermia, failure to thrive, and seizures. |
| <i>MYL5</i>   | Component of ATPase cellular motor protein myosin                     | Myosin has many neuronal functions, particularly at the synapse [85]                                                 |
| <i>MIPOL1</i> | Function is not well characterized                                    | Link to hand and feet abnormalities                                                                                  |
| <i>TMEM92</i> | Transmembrane protein with unknown function                           | Unknown                                                                                                              |
| <i>DHRS1</i>  | Functions as an oxidoreductase                                        | Associated with speech/ language impairment                                                                          |

**Supplementary Table 2.** Core PWS transcripts outside of the 15q11.2-13.1 region that were significantly different versus control in all PWS subgroup.

| <b>Gene</b>   | <b>Full Name</b>                                    | <b>Function</b>                                                    |
|---------------|-----------------------------------------------------|--------------------------------------------------------------------|
| <i>ACOT9</i>  | Acyl-CoA Thioesterase 9                             | Mitochondrial acyl-CoA thioesterase                                |
| <i>AGPAT5</i> | 1-Acylglycerol-3-Phosphate O-Acyltransferase 5      | Expressed in mitochondria                                          |
| <i>AIFM1</i>  | Apoptosis Inducing Factor Mitochondria Associated 1 | NADH oxidoreductase found in the mitochondrial intermembrane space |
| <i>BNIP1</i>  | BCL2 Interacting Protein 1                          | Involved in mitophagy                                              |
| <i>CLTC</i>   | Clathrin Heavy Chain                                | Expressed in mitochondria                                          |
| <i>CMC4</i>   | C-X9-C Motif Containing 4                           | Expressed in mitochondria                                          |
| <i>COX5B</i>  | Cytochrome C Oxidase Subunit 5B                     | Component of the electron transport chain                          |
| <i>COX7B</i>  | Cytochrome C Oxidase Subunit 7B                     | Component of the electron transport chain                          |
| <i>COX7C</i>  | Cytochrome C Oxidase Subunit 7C                     | Component of the electron transport chain                          |
| <i>CS</i>     | Citrate Synthase                                    | TCA cycle enzyme                                                   |
| <i>CYB5A</i>  | Cytochrome B5 Type A                                | Electron carrier expressed in mitochondria                         |

|                      |                                                                     |                                                                              |
|----------------------|---------------------------------------------------------------------|------------------------------------------------------------------------------|
| <b><i>EHHADH</i></b> | Enoyl-CoA Hydratase And 3-Hydroxyacyl CoA Dehydrogenase             | Involved in mitochondrial fatty acid oxidation                               |
| <b><i>FDXR</i></b>   | Ferredoxin Reductase                                                | Mitochondrial flavoprotein involved in the electron transport chain          |
| <b><i>GFM1</i></b>   | G Elongation Factor Mitochondrial 1                                 | Mitochondrial translation elongation factor                                  |
| <b><i>GHR</i></b>    | Growth Hormone Receptor                                             | Expressed in mitochondria                                                    |
| <b><i>GLUD1</i></b>  | Glutamate Dehydrogenase 1                                           | Mitochondrial matrix enzyme                                                  |
| <b><i>GPX1</i></b>   | Glutathione Peroxidase 1                                            | Protects cells from oxidative stress                                         |
| <b><i>GSTP1</i></b>  | Glutathione S-Transferase Pi 1                                      | Protects cells from oxidative stress                                         |
| <b><i>HAP1</i></b>   | Huntingtin Associated Protein 1                                     | Expressed in mitochondria                                                    |
| <b><i>MFN2</i></b>   | Mitofusin 2                                                         | Involved in mitochondrial fusion and maintenance of the mitochondrial matrix |
| <b><i>MINOS1</i></b> | Mitochondrial Contact Site And Cristae Organizing System Subunit 10 | Involved in the maintenance of mitochondrial architecture                    |
| <b><i>MRPL4</i></b>  | Mitochondrial Ribosomal Protein L4                                  | Component of the mitochondrial ribosomal 39S subunit                         |
| <b><i>MRPL41</i></b> | Mitochondrial Ribosomal Protein L41                                 | Component of the mitochondrial ribosomal 39S subunit                         |
| <b><i>MRPL47</i></b> | Mitochondrial Ribosomal Protein L47                                 | Component of the mitochondrial ribosomal 39S subunit                         |
| <b><i>MRPS33</i></b> | Mitochondrial Ribosomal Protein S33                                 | Component of the mitochondrial ribosomal 28S subunit                         |
| <b><i>MRPS5</i></b>  | Mitochondrial Ribosomal Protein S5                                  | Component of the mitochondrial ribosomal 28S subunit                         |
| <b><i>MTIF2</i></b>  | Mitochondrial Translational Initiation Factor 2                     | Mitochondrial translation intitation factor                                  |
| <b><i>NAXE</i></b>   | NAD(P)HX Epimerase                                                  | Involved in mitochondrial metabolic processes                                |

|                        |                                                               |                                                                 |
|------------------------|---------------------------------------------------------------|-----------------------------------------------------------------|
| <b><i>NDUFA1</i></b>   | NADH:Ubiquinone Oxidoreductase Subunit A1                     | Component of the electron transport chain                       |
| <b><i>NDUFV2</i></b>   | NADH:Ubiquinone Oxidoreductase Core Subunit V2                | Component of the electron transport chain                       |
| <b><i>NFS1</i></b>     | Cysteine Desulfurase, Mitochondrial                           | Expressed in mitochondria                                       |
| <b><i>NT5M</i></b>     | 5',3'-Nucleotidase, Mitochondrial                             | 5' nucleotidase localized to the mitochondrial matrix           |
| <b><i>OAT</i></b>      | Ornithine Aminotransferase                                    | Mitochondrial enzyme ornithine aminotransferase                 |
| <b><i>OXML1</i></b>    | Oxidoreductase Like Domain Containing 1                       | Expressed in mitochondria                                       |
| <b><i>PERP</i></b>     | P53 Apoptosis Effector Related To PMP22                       | Expressed in mitochondria                                       |
| <b><i>POR</i></b>      | Cytochrome P450 Oxidoreductase                                | Enzyme involved in electron transport                           |
| <b><i>PRKAR2B</i></b>  | Protein Kinase CAMP-Dependent Type II Regulatory Subunit Beta | Plays a role in regulating energy balance                       |
| <b><i>RMND1</i></b>    | Required For Meiotic Nuclear Division 1 Homolog               | Involved in mitochondrial translation                           |
| <b><i>SDHC</i></b>     | Succinate Dehydrogenase Complex Subunit C                     | Component of the electron transport chain                       |
| <b><i>SDHD</i></b>     | Succinate Dehydrogenase Complex Subunit D                     | Component of the electron transport chain                       |
| <b><i>SLC25A36</i></b> | Solute Carrier Family 25 Member 36                            | Mitochondrial transport protein                                 |
| <b><i>SLC25A39</i></b> | Solute Carrier Family 25 Member 39                            | Mitochondrial transport protein                                 |
| <b><i>SLC25A5</i></b>  | Solute Carrier Family 25 Member 5                             | Mitochondrial transport protein                                 |
| <b><i>SLC35F6</i></b>  | Solute Carrier Family 35 Member F6                            | Involved in the maintenance of mitochondrial membrane potential |
| <b><i>SUCLG2</i></b>   | Succinate-CoA Ligase GDP-Forming Subunit Beta                 | TCA cycle enzyme                                                |

|                |                                                                    |                                             |
|----------------|--------------------------------------------------------------------|---------------------------------------------|
| <i>SYNE2</i>   | Spectrin Repeat Containing Nuclear Envelope Protein 2              | Expressed in mitochondria                   |
| <i>TIMM17A</i> | Translocase Of Inner Mitochondrial Membrane 17A                    | Mitochondrial transport protein             |
| <i>TMEM160</i> | Transmembrane Protein 160                                          | Expressed in mitochondria                   |
| <i>TMTC1</i>   | Transmembrane O-Mannosyltransferase Targeting Cadherins 1          | Expressed in mitochondria                   |
| <i>TP63</i>    | Tumor Protein P63                                                  | Expressed in mitochondria                   |
| <i>TUFM</i>    | Tu Translation Elongation Factor, Mitochondrial                    | Mitochondrial translation elongation factor |
| <i>TXN</i>     | Thioredoxin                                                        | Involved in redox reactions                 |
| <i>UQCR10</i>  | Ubiquinol-Cytochrome C Reductase, Complex III Subunit X            | Component of the electron transport chain   |
| <i>UQCR11</i>  | Ubiquinol-Cytochrome C Reductase, Complex III Subunit XI           | Component of the electron transport chain   |
| <i>UQCRC2</i>  | Ubiquinol-Cytochrome C Reductase Core Protein 2                    | Component of the electron transport chain   |
| <i>UQCRFS1</i> | Ubiquinol-Cytochrome C Reductase, Rieske Iron-Sulfur Polypeptide 1 | Component of the electron transport chain   |
| <i>UQCRH</i>   | Ubiquinol-Cytochrome C Reductase Hinge Protein                     | Component of the electron transport chain   |
| <i>USP30</i>   | Ubiquitin Specific Peptidase 30                                    | Involved in mitophagy                       |

**Supplementary Table 3.** List of genes identified in DAVID mitochondrial enrichment categories.

## 1.1 Supplementary Figures

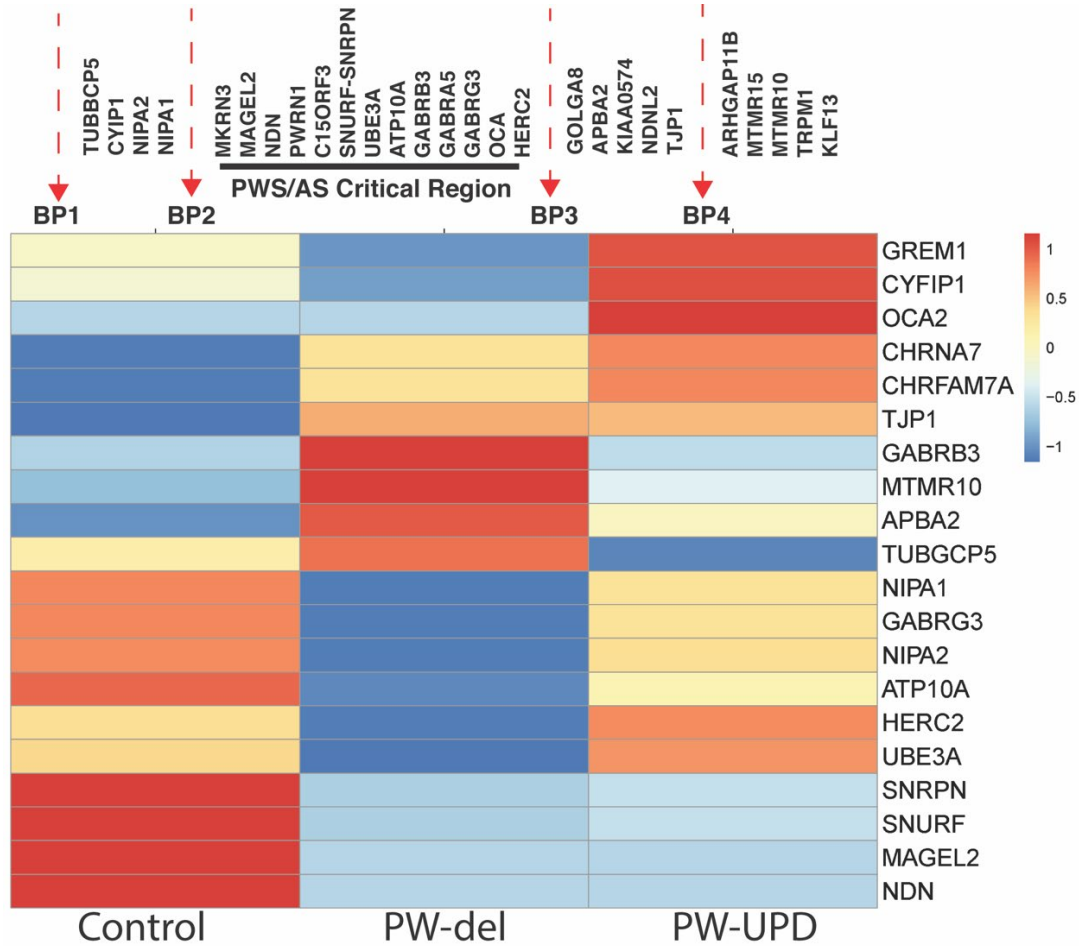

**Supplementary Figure 1. Genes in the 15q11.2-q13 critical region shows expected PWS imprinted expression.** Across the PWS/AS critical region, maternally imprinted genes such as *MAGEL2*, *SNRPN*, and *SNURF* showed decreased expression in both PW-del and PW-UPD neurons.

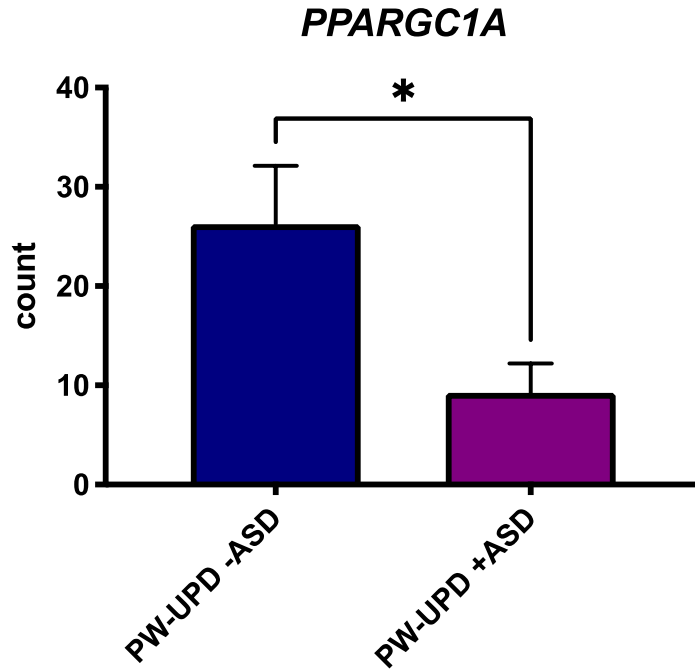

**Supplementary Figure 2. Expression of mitochondrial biogenesis factor, *PPARGC1A*, is significantly decreased in PW-UPD +ASD neurons.** Mean RNAseq count for each group is shown in the graph. Significance was determined by an unpaired *t*-test ( $p \leq 0.05$ ).
